# Supplementary material for: Automated classification platform for the identification of otitis media using optical coherence tomography
Source: PubMed Central journal article supplement (PMC6550205; doi:10.1038/s41746-019-0094-0), 2019-03-28
Supplement: 41746_2019_94_MOESM1_ESM.pdf [file 41746_2019_94_MOESM1_ESM.pdf]

## Automated classification platform for the identification of otitis media using optical coherence tomography (Supplementary material)

Guillermo L. Monroy<sup>1,2</sup>, Jungeun Won<sup>1,2</sup>, Roshan Dsouza<sup>2</sup>, Paritosh Pande<sup>2</sup>, Malcolm C. Hill<sup>3,4</sup>, Ryan G. Porter<sup>3,4</sup>, Michael A. Novak<sup>3,4</sup>, Darold R. Spillman<sup>2</sup>, Stephen A. Boppart<sup>\*1-5</sup>

<sup>1</sup>Department of Bioengineering, University of Illinois at Urbana-Champaign, Urbana, IL

<sup>2</sup>Beckman Institute for Advanced Science and Technology, Urbana, IL

<sup>3</sup>Carle Foundation Hospital, Otolaryngology, Urbana, IL

<sup>4</sup>Carle Illinois College of Medicine, Urbana, IL

<sup>5</sup>Department of Electrical and Computer Engineering, University of Illinois at Urbana-Champaign, Urbana, IL

\*Corresponding author

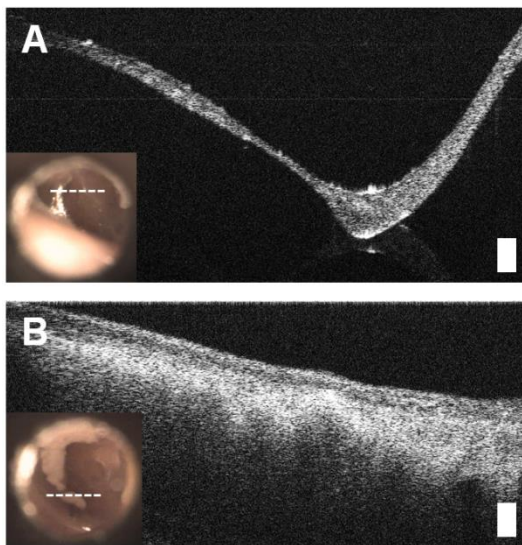

**Supplementary Figure 1:** OCT images demonstrating infrequently observed pathology of the TM. A: A dimeric TM that shows thinning of the fibrous layer. B: A TM with myringosclerosis. There are several conditions unrelated to an immediate OM infection but occasionally encountered in clinical practice. Datasets like these may confound the classifier in its current form due to segmentation issues in thinned regions, or misclassification of myringosclerosis as biofilms and fluid. With additional training data, cases outside of the expected OM-related class groupings can be managed. Scale bars indicate 100 micrometers in depth.

### Reduced SNR on fitting performance (additive Gaussian noise)

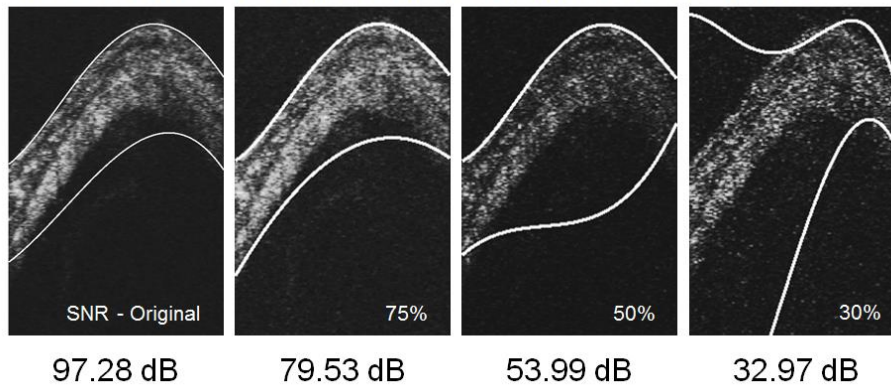

**Supplementary Figure 2:** Synthetically decreased signal-to-noise ratio (SNR) and fitting performance. Using additive Gaussian white noise, the SNR of test images (inset in each panel) was synthetically decreased and classified to empirically determine estimated SNR requirements for this platform. Fitting performance severely degrades near 33 dB (30% of original), leaving 55 dB (50% of original) as the approximate lower limit, and 80 dB (75% of original) as the suggested performance benchmark.

### Decreased resolution on classification (additive Gaussian blurring)

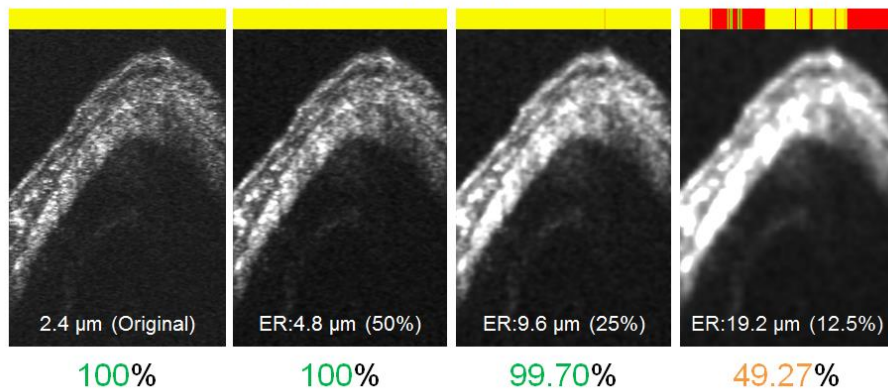

**Supplementary Figure 3:** Synthetically decreased resolution and classification performance. Using increasing additive Gaussian blurring (from left to right), test images were classified to empirically determine resolution requirements for this platform. Resolution in comparison to the original is inset in each panel. Classification accuracy (shown below each panel) degrades quickly when resolution reaches 12.5% of the original. ER: Effective resolution. Color bar represents predicted class (Green – normal / Yellow – Biofilm / Red – Biofilm and Fluid).

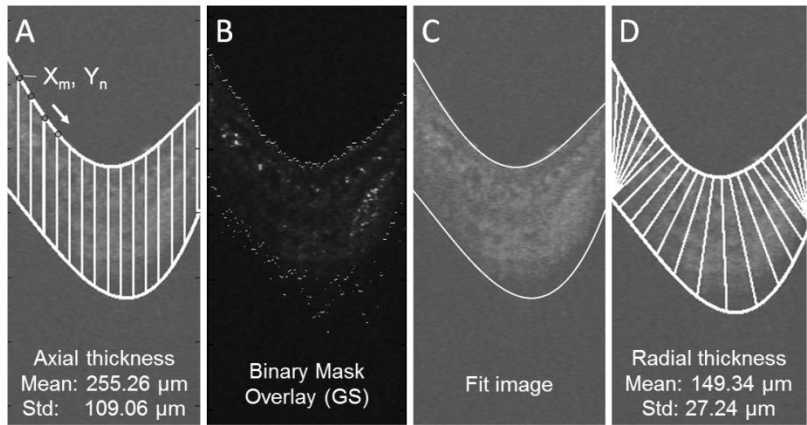

**Supplementary Figure 4:** Axial and radial thickness. A: Axial fitting and statistics. B: Binary mask with identified points for top and bottom edges. C: Fourth-order polynomial fitting through the points in B. D: Radial thickness fitting and statistics. Radial fitting has a more consistent thickness value across the TM when compared to axial fitting.

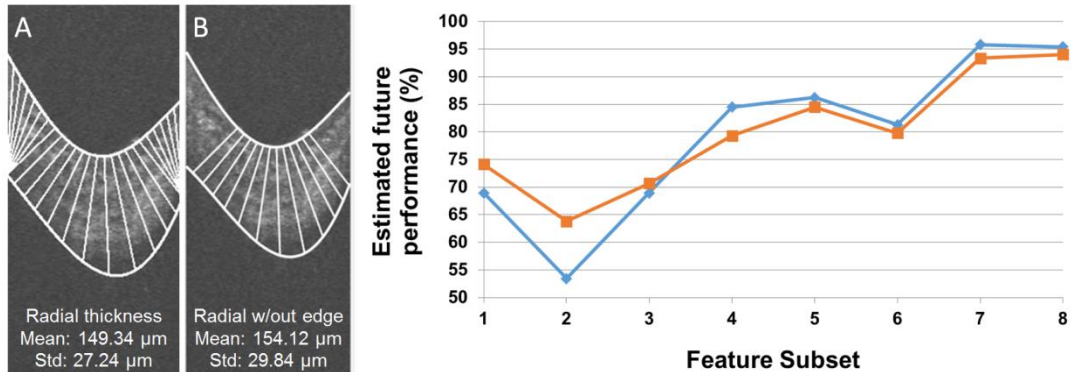

**Supplementary Figure 5:** Effects of removal of edge A-lines and classifier performance across feature subsets. A: Segmented and fitted image including edge a-lines shows the effect of the program near the edges of the image. B: Segmented and fitted image without the corner points. Fitted lines down sampled for display purposes. Right: Plot comparing the RF-classifier performance with (blue) and without (orange) edge data. Currently, removing the edge cases causes a slight drop in performance, consistent across feature subsets, likely due to the amount of data removed from the classifier database. In the future, as the database grows, edge cases can be safely ignored.

**Supplementary Table 1:** Clinical findings and consensus labels for OCT. OTO: Fluid identified by the physician using otoscopy, and OCT: fluid identified using OCT data. Discrepancies in fluid identification are bolded. Group # set by OCT reader study. Bilat: Bilateral; ETD: Eustachian tube dysfunction; COME: Chronic otitis media with effusion; RAOM: Recurrent acute otitis media; HL: Hearing loss; URI: Upper respiratory infection; TM: tympanic membrane.

| #  | Clinical Findings            | OTO      | OCT      | Group | #  | Clinical Findings   | OTO      | OCT      | Group |
|----|------------------------------|----------|----------|-------|----|---------------------|----------|----------|-------|
| 1  | Bilat. ETD, mucoid COME      | Y        | Y        | 2     | 30 | Normal control      | N        | N        | 1     |
| 2  | Bilat. ETD, mucoid COME      | Y        | Y        | 2     | 31 | Normal control      | N        | N        | 1     |
| 3  | ETD, RAOM                    | Y        | Y        | 2     | 32 | Normal control      | N        | N        | 1     |
| 4  | Bilat. ETD and COME          | Y        | Y        | 3     | 33 | Normal control      | N        | N        | 1     |
| 5  | No dictation avail.          | -        | Y        | 3     | 34 | Normal control      | N        | N        | 1     |
| 6  | No dictation avail.          | -        | Y        | 3     | 35 | Normal control      | N        | N        | 1     |
| 7  | No dictation avail.          | -        | Y        | 3     | 36 | Normal control      | N        | N        | 1     |
| 8  | No dictation avail.          | -        | Y        | 3     | 37 | Bilat. OME          | Y        | Y        | 3     |
| 9  | Bilat. ETD, mucoid COME, HL  | Y        | Y        | 2     | 38 | Bilat. OME          | Y        | Y        | 3     |
| 10 | Bilat. ETD, COME             | Y        | Y        | 3     | 39 | Bilat. OME          | Y        | Y        | 3     |
| 11 | Bilat. ETD, COME             | Y        | Y        | 2     | 40 | Dull TM             | N        | N        | 2     |
| 12 | Bilat. ETD, COME             | Y        | Y        | 2     | 41 | Normal control      | N        | N        | 1     |
| 13 | ETD, RAOM                    | Y        | Y        | 3     | 42 | Bilat. AOM          | Y        | Y        | 3     |
| 14 | ETD, RAOM                    | Y        | Y        | 3     | 43 | Bilat. AOM          | Y        | Y        | 3     |
| 15 | RAOM with effusion           | Y        | Y        | 3     | 44 | RAOM                | Y        | Y        | 3     |
| 16 | Bilat. COME, RAOM, ETD, HL   | Y        | Y        | 3     | 45 | Normal control      | N        | N        | 1     |
| 17 | RAOM, hearing loss           | Y        | Y        | 2     | 46 | Normal control      | <b>N</b> | <b>Y</b> | 3     |
| 18 | RAOM, hearing loss           | Y        | Y        | 2     | 47 | No OM complaints    | <b>N</b> | <b>Y</b> | 3     |
| 19 | Bilat. ETD, COME             | Y        | Y        | 3     | 48 | OME                 | Y        | Y        | 3     |
| 20 | Bilat. ETD, COME             | Y        | Y        | 3     | 49 | Opaque TM           | Y        | Y        | 3     |
| 21 | Bilat. ETD, COME             | Y        | Y        | 3     | 50 | No OM complaints    | <b>N</b> | <b>Y</b> | 3     |
| 22 | Bilat. ETD, COME             | Y        | Y        | 3     | 51 | No dictation avail. | -        | Y        | 3     |
| 23 | Bilat. ETD, COME             | Y        | Y        | 3     | 52 | Normal control      | N        | N        | 1     |
| 24 | ETD, RAOM                    | Y        | Y        | 3     | 53 | OME                 | Y        | Y        | 3     |
| 25 | Bilat. ETD, COME             | <b>Y</b> | <b>N</b> | 1     | 54 | Dull TM, OME        | Y        | Y        | 3     |
| 26 | Bilat. ETD, COME, HL         | Y        | Y        | 3     | 55 | AOM                 | Y        | Y        | 3     |
| 27 | Bilat. ETD, COME             | <b>Y</b> | <b>N</b> | 1     | 56 | Normal control      | N        | N        | 1     |
| 28 | Acute URI (persistent cough) | N        | N        | 1     | 57 | Normal control      | N        | N        | 1     |
| 29 | Normal control               | N        | N        | 1     | 58 | Normal control      | N        | N        | 1     |

**Supplementary Table 2:** Results from the clinically-focused leave-one B-scan out random forest classification test on Subsets 1-8.

| Feature subsets |                                      | Random Forest<br>Leave-one B-scan out CV |
|-----------------|--------------------------------------|------------------------------------------|
| 1               | Clinical report keywords             | 74.14                                    |
| 2               | OMGRADE scale                        | 74.14                                    |
| 3               | 6 Digital otoscopy metrics (custom)  | 63.79                                    |
| 4               | Physician info (1 + 2)               | 84.48                                    |
| 5               | All Clinical information (1 + 2 + 3) | 84.48                                    |
| 6               | 12 OCT metrics                       | 80.97                                    |
| 7               | Clinical & OCT features (5 + 6)      | 92.19                                    |
| 8               | Least useful 5 removed               | 91.57                                    |

**Supplementary Table 3:** Feature summary table.  $\sigma$ : Standard deviation; atten.: Attenuation; DO: Digital otoscopy; loc: location; MAD: Median absolute distance; Sat: Saturation.

| Feature                    | Source | Feature               | Source   |
|----------------------------|--------|-----------------------|----------|
| 1 Radial thickness         | OCT    | 11 Fourier peak width | OCT      |
| 2 $\sigma$ peak loc        | OCT    | 12 Fourier peak prom. | OCT      |
| 3 Mean peak width          | OCT    | 13 OMGRADE            | Scale    |
| 4 $\sigma$ peak width      | OCT    | 14 Clinical reports   | Keywords |
| 5 Mean peak prom.          | OCT    | 15 Hue, average       | DO       |
| 6 $\sigma$ peak prominence | OCT    | 16 Hue, median        | DO       |
| 7 Total # peaks            | OCT    | 17 Hue, MAD           | DO       |
| 8 Optical atten. max       | OCT    | 18 Sat., mean         | DO       |
| 9 Optical atten mean       | OCT    | 19 Sat., median       | DO       |
| 10 Optical atten sum       | OCT    | 20 Sat., MAD          | DO       |

**Supplementary Table 4:** Patient report keywords and point value. OM: Otitis media; TM: Tympanic membrane.

| <b>Keyword</b>                   | <b>Score</b> |
|----------------------------------|--------------|
| Normal ears                      | 0            |
| Unremarkable ears                | 0            |
| Clear or healthy TM              | 0            |
| Acute OM                         | 1            |
| Inflammation, erythema, inflamed | 1            |
| Fluid or effusion                | 1            |
| Recent infection                 | 1            |
| Smoke, asthma, allergies         | 1            |
| Family history of OM             | 1            |
| Opaque or dull TM                | 1            |
| Recurrent or chronic OM          | 2            |
| Antibiotics                      | 2            |
| Referral                         | 2            |
| Persistent or recurrent          | 2            |
| Purulent, mucoid, mucopurulent   | 2            |
